# Supplementary material for: Locality of conical intersections in semiconductor nanomaterials
Source: Royal Society of Chemistry journal article supplement (doi:10.1039/c9cp01584a), 2019-01-01
Supplement: c9cp01584a1.pdf [file c9cp01584a1.pdf]

**Supplementary Information For “Locality of Conical Intersections in Semiconductor Nanomaterials”**

Benjamin G. Levine\*, Wei-Tao Peng, Michael P. Esch  
Department of Chemistry, Michigan State University, East Lansing, MI 48824

\* to whom correspondence should be addressed: levine@chemistry.msu.edu

Within this document are the Cartesian coordinates for all geometries provided in the text, as well as calculated electronic state energies. All electronic state energies are listed in atomic units and molecular geometries are written in Angstrom.

**Silicon Nanocrystal with Single Dangling Bond Defect (Si<sub>72</sub>H<sub>63</sub>)**

E<sub>S0</sub>(FOMO-CASCI) = -307.29971813

E<sub>S1</sub>(FOMO-CASCI) = -307.29899551

**XYZ Coordinates (Angstrom):**

---

|    |               |               |               |
|----|---------------|---------------|---------------|
| Si | 0.0076002773  | 0.0056878681  | 2.3708277395  |
| Si | 0.0388678163  | -0.0271752787 | 4.7433961007  |
| Si | 2.2231615770  | 0.0460193503  | 1.5502747400  |
| Si | 2.2309883884  | 0.0643150535  | -0.8191592070 |
| Si | -1.0660751180 | -1.9621135920 | 1.6143122203  |
| Si | -1.1177450367 | 1.9420816251  | 1.5795860257  |
| Si | -1.1044802497 | -1.9183219249 | -0.7636832829 |
| Si | -1.1208353745 | 1.9503635050  | -0.8034979572 |
| Si | 0.1301609942  | -3.8721305426 | 2.3984874764  |
| Si | 3.2514668906  | -1.9332589739 | 2.2374923626  |
| Si | 0.1938841260  | -3.9748777120 | 4.7475493911  |
| Si | 3.2965035309  | -2.2402336536 | 4.5774371711  |
| Si | 1.1580409709  | -1.9724038170 | 5.4960694492  |
| Si | 2.3655890295  | -4.5148827101 | 1.5266609144  |
| Si | -2.2569459388 | 0.0077989005  | -1.5797008146 |
| Si | 1.1153121864  | 2.0032212908  | -1.6160278910 |
| Si | 1.1360977731  | -1.9045997432 | -1.5552269043 |
| Si | -2.2511119269 | 3.8774231123  | -1.5941466582 |
| Si | -2.2501982494 | 3.8445155187  | -3.9618836196 |
| Si | -3.2920693497 | 1.9173367229  | -4.8158434595 |
| Si | -0.0928976178 | 3.7689470538  | -4.8972864592 |
| Si | -2.2405977541 | -0.0088411470 | -3.9540753312 |
| Si | 1.1066941992  | 1.9557245775  | -3.9887394326 |
| Si | -0.0006399813 | -0.0063687198 | -4.6770408721 |
| Si | 2.3185666224  | -3.8253030086 | -0.8165559723 |
| Si | 1.1236974130  | -1.9327837569 | -3.9235026057 |
| Si | 4.4958219790  | -3.8050515651 | -1.7201730349 |
| Si | 1.1355267989  | -5.7329503979 | -1.6297484031 |
| Si | 0.0065071529  | -3.8673699020 | -4.6944504959 |
| Si | 3.3412608519  | -1.9179429734 | -4.7380920371 |
| Si | 1.1533283460  | -5.7808705948 | -3.9757829612 |
| Si | 4.4533693174  | -3.8700665055 | -4.0619187771 |
| Si | -2.1949866705 | 0.0001916491  | 5.5231179376  |
| Si | 1.1284092509  | 1.9269302186  | 5.5090838101  |

---

---

|    |               |               |               |
|----|---------------|---------------|---------------|
| Si | -3.3322328673 | 1.9562066057  | 2.4007970846  |
| Si | -0.0237825128 | 3.8758716038  | 2.3893989698  |
| Si | -4.4575359232 | 3.8719699829  | -0.7385149150 |
| Si | -1.1484542182 | 5.7960154540  | -0.7560246118 |
| Si | -1.1731836457 | 5.7859797714  | 1.5991457948  |
| Si | -0.0237546411 | 3.8378079940  | 4.7535862745  |
| Si | -3.2837909112 | 1.9457248444  | 4.7646212878  |
| Si | -4.4248951462 | 3.8996783235  | 1.6152457231  |
| Si | -2.2309368513 | 3.8895113349  | 5.5538717009  |
| Si | -3.3566633100 | 5.8107704624  | 2.4557169506  |
| Si | -3.3302852151 | 5.8197767295  | 4.8004680732  |
| Si | -3.2028966949 | -1.9481115614 | -4.8772995077 |
| Si | -4.4790396219 | 0.0235634836  | -0.7441136282 |
| Si | -2.2451393375 | -3.8397815971 | -1.5492493921 |
| Si | -2.2134434203 | -3.8462197707 | -3.9151866920 |
| Si | -0.8836131062 | -5.8534195153 | 1.5537186624  |
| Si | -1.0657385351 | -5.7445897805 | -0.7845133043 |
| Si | -3.3038699787 | -1.9449390977 | 2.4087992635  |
| Si | -4.3733830466 | 0.0025995986  | 1.6076930327  |
| Si | -5.6731813604 | -1.8985494286 | -1.3957598948 |
| Si | -4.6061115241 | -3.7353471865 | 1.5981350578  |
| Si | -4.4727910760 | -3.8151922249 | -0.7483541829 |
| Si | 3.3527705657  | -5.8108167116 | -4.7878257736 |
| Si | 3.3613180139  | 1.9594758698  | 2.3734002379  |
| Si | 2.2145542231  | 3.9343855207  | -0.7782135698 |
| Si | 2.1840045051  | 3.8467346744  | 1.5780379879  |
| Si | 5.5596252189  | -1.8869396835 | -0.8781057869 |
| Si | 4.4330166157  | 0.0269401859  | -3.9732774914 |
| Si | 4.4654595593  | 0.0797696298  | -1.6059128755 |
| Si | 5.5664383491  | 2.1185873056  | 1.5530678480  |
| Si | 4.4843011713  | 4.0193135439  | -1.4035332562 |
| Si | 5.5559306464  | 2.0161316189  | -0.7953483948 |
| Si | 3.3374274601  | 2.0774630361  | 4.7257763447  |
| Si | -3.4698393347 | -1.8138707218 | 4.7520130667  |
| Si | -5.7067968479 | 1.9610214077  | -1.2849404613 |
| Si | 1.1164724177  | 5.9340999367  | -1.3612258894 |
| Si | 5.4567684811  | -2.2195877210 | 1.4342453542  |
| Si | 3.2727534258  | 1.8417241656  | -4.9073993858 |
| H  | 3.3462226780  | -5.8757488699 | -6.2611360495 |
| H  | 4.0575605465  | -6.9974131540 | -4.2653154696 |
| H  | 0.4228055487  | -6.9830750383 | -4.4318051355 |
| H  | 5.8422355555  | -3.8476807973 | -4.5691446044 |
| H  | 5.2102235349  | -4.9867614124 | -1.1908601692 |
| H  | 3.2799795304  | -1.8593258373 | -6.2154633257 |
| H  | 1.8291913638  | -6.9283667253 | -1.1067286987 |
| H  | -0.0154167020 | -3.8158962458 | -6.1729377676 |
| H  | 5.8327736596  | 0.0170082342  | -4.4530938889 |
| H  | 6.9723057679  | -1.8441731863 | -1.3124276253 |
| H  | -1.7585878451 | -6.9531071087 | -1.2812313213 |
| H  | -2.9032559171 | -5.0686477947 | -4.3807009684 |
| H  | -2.1844335052 | -6.0562979790 | 2.2059284518  |

---

---

|   |               |               |               |
|---|---------------|---------------|---------------|
| H | -0.0150511567 | -6.9901711361 | 1.9069712129  |
| H | 5.8870691918  | -3.5932552577 | 1.7485806756  |
| H | 6.3022436936  | -1.2959688665 | 2.2096049735  |
| H | 6.9452124135  | 2.0191709680  | -1.3015674417 |
| H | 4.0005769785  | 3.1068692531  | -4.7317832803 |
| H | 3.1327486158  | 1.6046783296  | -6.3575156110 |
| H | -0.0016345125 | -0.0220192205 | -6.1575893667 |
| H | -4.6671523728 | -1.9458092559 | -4.7508424050 |
| H | -2.8772262187 | -1.9489619377 | -6.3169131662 |
| H | -5.1555624499 | -5.0268163064 | -1.2509614564 |
| H | -4.7102404438 | 5.8521220266  | 5.3196531593  |
| H | -2.6175022376 | 7.0185907091  | 5.2819160604  |
| H | -4.0566770432 | 7.0082452598  | 1.9460349560  |
| H | -2.2052634557 | 3.8626155354  | 7.0317085293  |
| H | 0.7059525339  | 5.0379451000  | 5.2204600205  |
| H | -0.4382938287 | 6.9799115442  | 2.0708599351  |
| H | -5.8250762583 | 3.8570148611  | 2.0895292391  |
| H | -4.6828899720 | 1.9096361080  | 5.2445886612  |
| H | -5.1430227770 | 5.0896711229  | -1.2222828390 |
| H | -1.8732032858 | 6.9925601329  | -1.2366616102 |
| H | 1.1242799976  | 1.9194311872  | 6.9886279421  |
| H | -2.1651284030 | 0.0089185832  | 7.0020961362  |
| H | -5.7634210639 | -0.0330270519 | 2.1141907802  |
| H | 1.2504730830  | -1.9317926481 | 6.9711231104  |
| H | 2.8891912936  | 5.0488410902  | 2.0776013812  |
| H | -2.9546652615 | 5.0520111482  | -4.4453260526 |
| H | -6.8950611115 | 1.9573002189  | -0.4079777109 |
| H | -6.1781871239 | 1.9567266320  | -2.6774575875 |
| H | -3.0851761039 | -3.0750013580 | 5.4004318088  |
| H | -4.8856594205 | -1.5534437255 | 5.0779006530  |
| H | 3.9015265915  | 3.3834234507  | 5.1201352677  |
| H | 4.1801146605  | 1.0226093507  | 5.3116647741  |
| H | 1.3022243533  | 6.2609355322  | -2.7832235299 |
| H | 1.7278151306  | 7.0146696742  | -0.5620914299 |
| H | -6.9431511311 | -1.8982149961 | -0.6415467730 |
| H | -5.9946246761 | -1.8668044024 | -2.8305640124 |
| H | -6.0076561482 | -3.4240960396 | 1.9446632936  |
| H | -4.2523785059 | -5.0110984204 | 2.2369987743  |
| H | -1.1261220549 | -4.2683107540 | 5.3193262742  |
| H | 1.1095911072  | -5.0671351093 | 5.1264859133  |
| H | 4.3286681026  | -1.3456454741 | 5.1233086827  |
| H | 3.7317896234  | -3.6251365369 | 4.8298737253  |
| H | 6.0826344429  | 3.4463483278  | 1.9415354394  |
| H | 6.4345468528  | 1.0977060015  | 2.1602235847  |
| H | 4.6428605522  | 4.3511312951  | -2.8268045320 |
| H | 5.1054058241  | 5.1007843207  | -0.6119526705 |
| H | -0.2471736554 | 3.5114448810  | -6.3440957393 |
| H | -4.7330203240 | 1.8914639066  | -4.5237388865 |
| H | 0.6437048613  | 5.0321223019  | -4.7344943837 |
| H | -3.1272290280 | 1.9148404136  | -6.2833083349 |

---

**Pristine Silicon Nanocrystal (Si<sub>72</sub>H<sub>63</sub>)**E<sub>so</sub>(FOMO-CASCI) = -307.81162398E<sub>si</sub>(FOMO-CASCI) = -307.81076034**XYZ Coordinates (Angstrom):**

---

|    |               |               |               |
|----|---------------|---------------|---------------|
| Si | 0.0188827288  | -0.0799628441 | 2.3719069454  |
| Si | 0.0591693409  | -0.1045630605 | 4.7358721923  |
| Si | 2.2693204915  | -0.0055126145 | 1.5633204522  |
| Si | 2.2549482744  | 0.0070674596  | -0.8043294241 |
| Si | -1.2017115857 | -1.9880846587 | 1.6245173959  |
| Si | -1.0962314360 | 1.8831196612  | 1.5852662116  |
| Si | -1.1370227659 | -1.9617975324 | -0.7529379309 |
| Si | -1.1068295430 | 1.9114538364  | -0.7949612790 |
| Si | -0.3957709276 | -4.0097895592 | 2.4974123336  |
| Si | 3.5722618432  | -1.8169724335 | 2.3000267826  |
| Si | 0.0953618409  | -4.0668888670 | 4.7746073900  |
| Si | 3.3738664839  | -2.2976871555 | 4.6049661267  |
| Si | 1.1786163900  | -2.0814447687 | 5.4257504336  |
| Si | 2.5742064139  | -4.6149305692 | 1.5026443891  |
| Si | -2.2619842253 | -0.0180560191 | -1.5724877225 |
| Si | 1.1344583621  | 1.9510175775  | -1.6024151952 |
| Si | 1.1315547486  | -1.9616180064 | -1.5160276582 |
| Si | -2.2236462855 | 3.8510253917  | -1.5856850517 |
| Si | -2.2378630093 | 3.8311800029  | -3.9519934753 |
| Si | -3.2518910744 | 1.9100154297  | -4.8496749916 |
| Si | -0.0767404377 | 3.7654531573  | -4.8683851019 |
| Si | -2.2518679963 | -0.0217616558 | -3.9444216574 |
| Si | 1.1065168168  | 1.9321795849  | -3.9761376893 |
| Si | -0.0090337804 | -0.0289084978 | -4.6515870177 |
| Si | 2.3430886635  | -3.8916230359 | -0.8323276196 |
| Si | 1.1119437384  | -1.9544476962 | -3.8943179760 |
| Si | 4.4940612437  | -3.8303049719 | -1.7959587214 |
| Si | 1.1365053149  | -5.7679463065 | -1.6639740057 |
| Si | -0.0099471238 | -3.8756817760 | -4.6927112881 |
| Si | 3.3139040310  | -1.9055929627 | -4.7513794976 |
| Si | 1.1484137335  | -5.7978120765 | -4.0147183965 |
| Si | 4.4450964263  | -3.8597276418 | -4.1378567109 |
| Si | -2.1771619348 | -0.0355910125 | 5.5222672550  |
| Si | 1.1377371725  | 1.8533537540  | 5.5128790931  |
| Si | -3.3183796228 | 1.9470958859  | 2.4045729867  |
| Si | -0.0096382133 | 3.8226575109  | 2.3945478776  |
| Si | -4.4334917773 | 3.8640985752  | -0.7388069676 |
| Si | -1.1088572161 | 5.7662916501  | -0.7512538855 |
| Si | -1.1355560161 | 5.7479445972  | 1.6045981709  |
| Si | -0.0024450860 | 3.7772720889  | 4.7598645687  |
| Si | -3.2547413260 | 1.9251402977  | 4.7703794610  |
| Si | -4.3927719119 | 3.8992950060  | 1.6157554980  |
| Si | -2.2074019810 | 3.8706855010  | 5.5575581849  |
| Si | -3.3199349486 | 5.8075688781  | 2.4512436116  |
| Si | -3.3052104843 | 5.8014538430  | 4.7960049532  |

---

---

|    |               |               |               |
|----|---------------|---------------|---------------|
| Si | -3.2198830493 | -1.9512980455 | -4.8831087844 |
| Si | -4.4949850507 | 0.0248131441  | -0.7558671320 |
| Si | -2.2659352862 | -3.8785064700 | -1.5631698796 |
| Si | -2.2369005477 | -3.8584323523 | -3.9294450494 |
| Si | -1.0417615572 | -6.0204450579 | 1.5009975108  |
| Si | -1.0771710019 | -5.7957097788 | -0.8404397736 |
| Si | -3.4422493520 | -1.8828363552 | 2.4113856935  |
| Si | -4.4586877780 | 0.0598753530  | 1.5972787070  |
| Si | -5.6830380034 | -1.9150298820 | -1.3800700532 |
| Si | -4.6304606628 | -3.7515254753 | 1.6134326553  |
| Si | -4.4873154322 | -3.8384462263 | -0.7337239138 |
| Si | 3.3131215825  | -5.7608292304 | -4.9198951590 |
| Si | 3.3648217663  | 1.9442679401  | 2.3871655263  |
| Si | 2.2367588386  | 3.8863016411  | -0.7733927775 |
| Si | 2.1929968355  | 3.8173230634  | 1.5822286207  |
| Si | 5.6096160460  | -1.9353449765 | -0.9552840410 |
| Si | 4.4250197224  | 0.0263501544  | -3.9858386129 |
| Si | 4.4843737857  | 0.0373854778  | -1.6181867378 |
| Si | 5.5671427079  | 2.1371226888  | 1.5689918499  |
| Si | 4.5039464647  | 3.9574042905  | -1.4186077614 |
| Si | 5.5745821777  | 1.9649446404  | -0.7787210825 |
| Si | 3.3406764949  | 2.0782330094  | 4.7373665995  |
| Si | -3.5306613103 | -1.7967784992 | 4.7611485377  |
| Si | -5.6841071020 | 1.9700038116  | -1.3468915214 |
| Si | 1.1576330737  | 5.8986754428  | -1.3530204477 |
| Si | 5.7227199771  | -2.1080602865 | 1.3822965968  |
| Si | 3.2566487848  | 1.8280877733  | -4.9283870517 |
| H  | 3.2100966722  | -5.6985221014 | -6.3903542808 |
| H  | 4.0513496408  | -6.9838073862 | -4.5539690591 |
| H  | 0.4178013177  | -6.9949523078 | -4.4837265940 |
| H  | 5.8196476039  | -3.8213514078 | -4.6793271694 |
| H  | 5.2137153016  | -5.0300451362 | -1.3133251805 |
| H  | 3.2017935923  | -1.8073489709 | -6.2234008930 |
| H  | 1.8071759295  | -6.9860036852 | -1.1509521880 |
| H  | -0.0268197266 | -3.7967124892 | -6.1706226330 |
| H  | 5.8215080140  | 0.0039649608  | -4.4746830895 |
| H  | 6.9865180247  | -1.8745916197 | -1.4918268515 |
| H  | -1.7505049730 | -6.9811211113 | -1.4166908487 |
| H  | -2.9239807882 | -5.0769232788 | -4.4104830494 |
| H  | -2.3468880404 | -6.5154218279 | 1.9662936970  |
| H  | -0.0354466263 | -7.0364545493 | 1.8666719975  |
| H  | 6.2165344438  | -3.4310660632 | 1.7949566639  |
| H  | 6.6308245831  | -1.0993676916 | 1.9509845292  |
| H  | 6.9703170534  | 1.9621876306  | -1.2680550737 |
| H  | 3.9759489366  | 3.1044774312  | -4.7990228662 |
| H  | 3.0813668478  | 1.5437220032  | -6.3666304496 |
| H  | -0.0057614005 | -0.0544897545 | -6.1318057445 |
| H  | -4.6849069306 | -1.9448419232 | -4.7536446296 |
| H  | -2.8894088240 | -1.9417758226 | -6.3228937021 |
| H  | -5.1889930763 | -5.0435144706 | -1.2258718955 |
| H  | -4.6908744468 | 5.8219794030  | 5.3026239233  |

---

---

|   |               |               |               |
|---|---------------|---------------|---------------|
| H | -2.6020054190 | 6.9999435592  | 5.2922149613  |
| H | -4.0072759817 | 7.0137598658  | 1.9437214856  |
| H | -2.1926753605 | 3.8501085967  | 7.0357516397  |
| H | 0.7501507448  | 4.9615713772  | 5.2286180937  |
| H | -0.3781607438 | 6.9260895943  | 2.0810245837  |
| H | -5.7884925486 | 3.8575669461  | 2.1027945233  |
| H | -4.6514632014 | 1.8781286249  | 5.2555521883  |
| H | -5.1087920982 | 5.0877818934  | -1.2234711266 |
| H | -1.8272038941 | 6.9678088524  | -1.2299057188 |
| H | 1.1205066121  | 1.8393620627  | 6.9922546858  |
| H | -2.1414733263 | -0.0183781771 | 7.0015523210  |
| H | -5.8608684231 | 0.1114191479  | 2.0696233683  |
| H | 1.2869559449  | -2.0486577077 | 6.9018641932  |
| H | 2.8796020399  | 5.0291108879  | 2.0822766504  |
| H | -2.9480986995 | 5.0400934160  | -4.4222291135 |
| H | -6.9206015877 | 1.9706366121  | -0.5394141024 |
| H | -6.0735805974 | 1.9843397373  | -2.7643953531 |
| H | -3.1713746930 | -3.0886591741 | 5.3658628615  |
| H | -4.9216981638 | -1.4798422047 | 5.1438391334  |
| H | 3.8185791248  | 3.4254913007  | 5.1065885136  |
| H | 4.2490603357  | 1.0877493475  | 5.3393921975  |
| H | 1.3541569260  | 6.2412716927  | -2.7697513907 |
| H | 1.7755733628  | 6.9677980581  | -0.5425949074 |
| H | -6.9505010691 | -1.9148182920 | -0.6210812754 |
| H | -6.0179778093 | -1.9028224362 | -2.8115247525 |
| H | -6.0533469734 | -3.5638336247 | 1.9612800331  |
| H | -4.1594483032 | -4.9807383219 | 2.2680348544  |
| H | -1.0891621793 | -4.2954857168 | 5.6200610805  |
| H | 1.0397355950  | -5.1750093920 | 5.0126132748  |
| H | 4.3112754421  | -1.3840639962 | 5.2861786046  |
| H | 3.8372286404  | -3.6761115200 | 4.8494494201  |
| H | 6.0220957767  | 3.5026229682  | 1.8992564058  |
| H | 6.4734387436  | 1.1918310777  | 2.2375860394  |
| H | 4.6397071708  | 4.2395734076  | -2.8550495990 |
| H | 5.1388194401  | 5.0627138704  | -0.6730811094 |
| H | -0.2073263523 | 3.5346456373  | -6.3213094271 |
| H | -4.7110674918 | 1.8975886617  | -4.6702197631 |
| H | 0.6643114850  | 5.0211222961  | -4.6760529597 |
| H | -2.9736465456 | 1.8999390981  | -6.3002643924 |
| H | 4.0611755912  | -4.8856377279 | 1.3841936859  |

---

## Linear Polyenes

### Ethylene Ground State

**Figure SP1:** a) Ground state minimum energy geometry of ethylene optimized at the B3LYP/6-31G\*\* level of theory and verified with a harmonic frequency calculation. b) Fractionally occupied state averaged natural orbitals (SANOs) at the ground state geometry, calculated at the state averaged complete active space self-consistent field method with an active space of two electrons in two orbitals, averaging over the first two electronic states (SA2-CASSCF(2/2)) using the 6-31G\*\* basis set. Orbitals in this figure were generated using an iso value of 0.05.

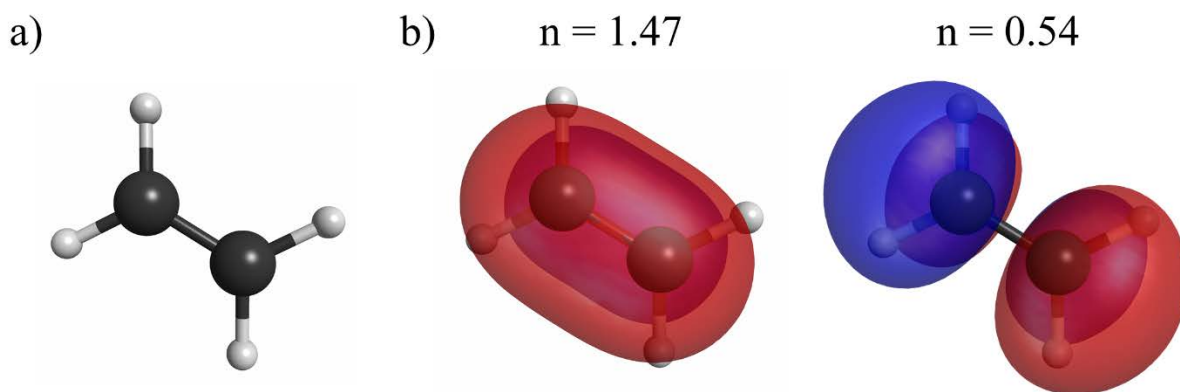

$E_{S0}(\text{B3LYP}) = -78.53378941$

$E_{S0}(\text{SA-CASSCF}) = -78.05666217$

$E_{S1}(\text{SA-CASSCF}) = -77.67911571$

XYZ Coordinates (Angstrom):

|   |             |             |             |
|---|-------------|-------------|-------------|
| C | 0.03299228  | -0.11889318 | 0.00907007  |
| C | -0.00991525 | 0.06922682  | 1.32592408  |
| H | 0.95299243  | 0.00203732  | -0.55742249 |
| H | 0.87311328  | 0.35206457  | 1.89348898  |
| H | -0.92975570 | -0.05162988 | 1.89261881  |
| H | -0.84995105 | -0.40179666 | -0.55867946 |

### Ethylene Minimal Energy Conical Intersection (MECI)

**Figure SP2:** a) Ethylene twisted and pyramidalized conical intersection (CI) optimized at the SA2-CASSCF(2/2)/6-31G\*\* level of theory. b) Fractionally occupied SANOs calculated at the same geometry and level of theory. Orbitals in this figure were generated using an iso value of 0.10.

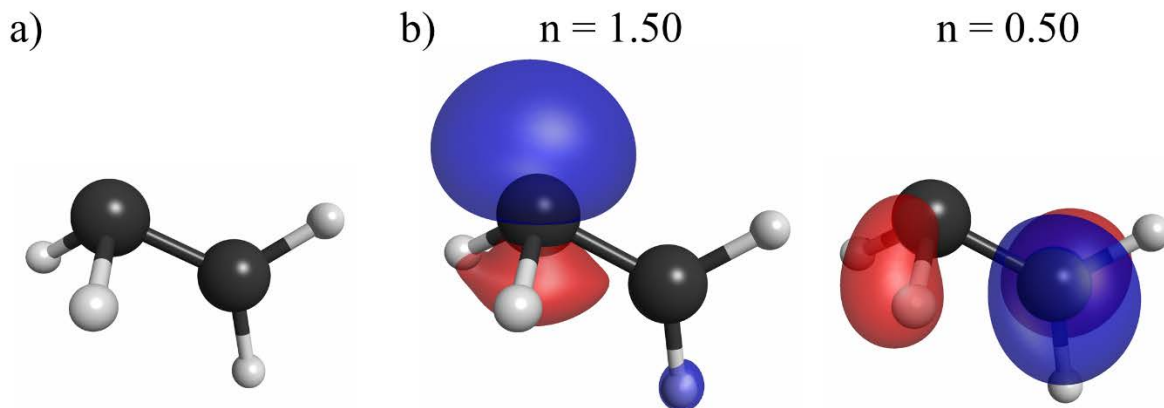

$E_{S_0}(\text{SA-CASSCF}) = -77.84962276$

$E_{S_1}(\text{SA-CASSCF}) = -77.84903694$

XYZ Coordinates (Angstrom):

|   |             |             |             |
|---|-------------|-------------|-------------|
| C | -1.85664260 | 0.01491828  | -0.40730906 |
| C | -0.61846185 | -0.22001444 | 0.17102659  |
| H | 0.34368208  | -0.10652418 | -0.33115253 |
| H | -1.98519969 | 0.80636662  | -1.13417888 |
| H | -1.39500201 | -0.79568094 | -1.11483955 |
| H | -0.52955925 | -0.69955528 | 1.14192414  |

### Butadiene Ground State

**Figure SP3:** a) Ground state minimum energy geometry of butadiene optimized at the B3LYP/6-31G\*\* level of theory and verified with a harmonic frequency calculation. b) Fractionally occupied SANOs at the ground state geometry, calculated at the SA2-CASSCF(4/4)/6-31G\*\* level of theory. Orbitals in this figure were generated using an iso value of 0.05.

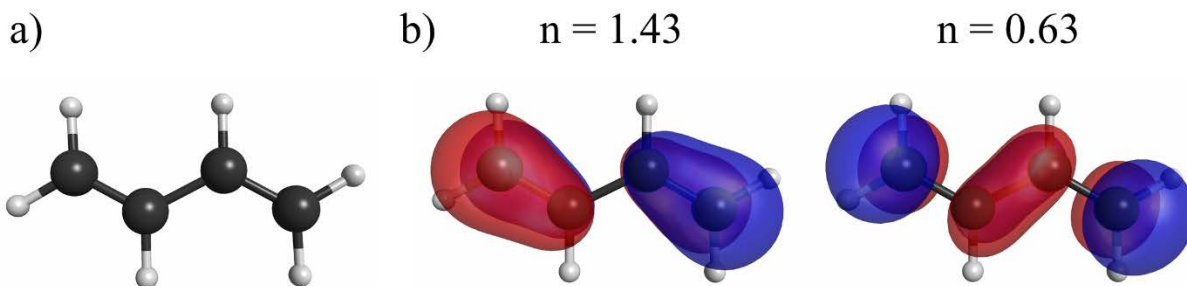

$E_{S_0}(\text{B3LYP}) = -155.88846909$

$E_{S_0}(\text{SA-CASSCF}) = -154.98072248$

$E_{S_1}(\text{SA-CASSCF}) = -154.73391159$

XYZ Coordinates (Angstrom):

|   |             |             |             |
|---|-------------|-------------|-------------|
| C | -0.02492233 | -0.09587989 | 0.07776005  |
| C | -0.04703417 | 0.04898262  | 1.41050393  |
| C | 1.19048270  | -0.10657506 | -0.72694275 |
| C | 1.21417076  | -0.25031786 | -2.05974994 |



|   |             |             |             |
|---|-------------|-------------|-------------|
| H | 2.14529229  | -0.25225987 | -2.61795870 |
| H | 0.29908422  | -0.37176253 | -2.63472615 |
| H | 2.12893785  | 0.01227956  | -0.18469299 |
| H | -0.96388915 | -0.21526532 | -0.46354129 |
| H | -0.97738167 | 0.05080022  | 1.96985654  |
| H | 0.86902348  | 0.17171112  | 1.98386629  |

### Butadiene MECI

**Figure SP4:** a) Butadiene twisted and pyramidalized CI optimized at the SA2-CASSCF(4/4)/6-31G\*\* level of theory. b) Fractionally occupied SANOs calculated at the same geometry and level of theory. Orbitals in this figure were generated using an iso value of 0.10.

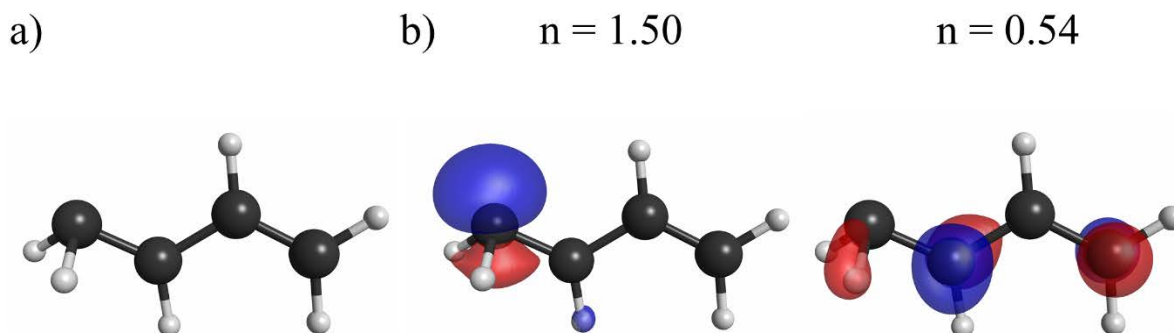

$E_{S_0}(\text{SA-CASSCF}) = -154.78271115$

$E_{S_1}(\text{SA-CASSCF}) = -154.78209231$

### XYZ Coordinates (Angstrom):

|   |             |             |             |
|---|-------------|-------------|-------------|
| C | -1.88087237 | -0.02421518 | -0.39643210 |
| C | -0.62328744 | -0.21704181 | 0.17726409  |
| C | 0.60920984  | -0.00281282 | -0.55347943 |
| C | 1.81088054  | 0.07257514  | 0.06295758  |
| H | -1.86741924 | 0.81892288  | 0.40707180  |
| H | -2.71840596 | -0.56950217 | 0.03487498  |
| H | -0.45688996 | -0.40949029 | 1.24239540  |
| H | 0.50714326  | 0.11126217  | -1.61594069 |
| H | 1.90287828  | -0.01803994 | 1.13088524  |
| H | 2.71676278  | 0.23834209  | -0.48959684 |

### Hexatriene Ground State

**Figure SP5:** a) Ground state minimum energy geometry of hexatriene optimized at the B3LYP/6-31G\*\* level of theory and verified with a harmonic frequency calculation. b) Fractionally occupied SANOs at the ground state geometry, calculated at the SA2-CASSCF(6/6)/6-31G\*\* level of theory. Orbitals in this figure were generated using an iso value of 0.05.

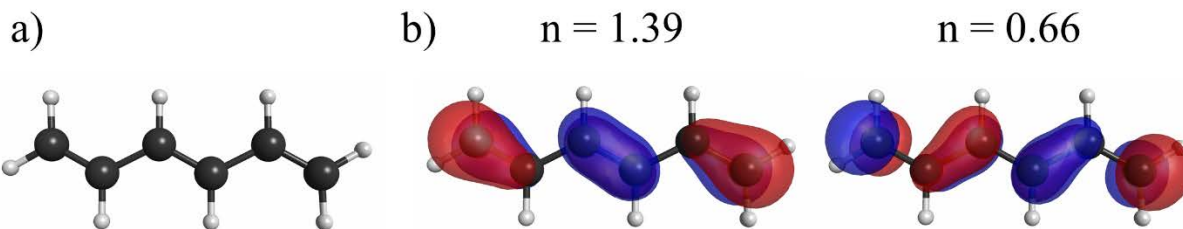

$E_{S0}(\text{B3LYP}) = -233.24497274$   
 $E_{S0}(\text{SA-CASSCF}) = -231.90035365$   
 $E_{S1}(\text{SA-CASSCF}) = -231.69561170$

XYZ Coordinates (Angstrom):

|   |             |             |             |
|---|-------------|-------------|-------------|
| C | -0.08131535 | 0.07691485  | 1.44833053  |
| C | -0.03367677 | -0.11202062 | 0.11924094  |
| C | 1.18401833  | -0.10105863 | -0.66863810 |
| C | 1.22773302  | -0.28932846 | -2.00720990 |
| C | 2.44558889  | -0.27813769 | -2.79498200 |
| H | 0.29583875  | -0.46302766 | -2.54689656 |
| H | 2.11597936  | 0.07302443  | -0.12916277 |
| H | -0.96189792 | -0.28665364 | -0.42572471 |
| H | -1.01953430 | 0.06019692  | 1.99359842  |
| H | 0.82001319  | 0.25534638  | 2.02993645  |
| C | 2.49326477  | -0.46585077 | -4.12418803 |
| H | 3.37373750  | -0.10359523 | -2.24980511 |
| H | 3.43148268  | -0.44854229 | -4.66942350 |
| H | 1.59193287  | -0.64360961 | -4.70608970 |

### Hexatriene MECI

Figure SP6: a) Hexatriene twisted and pyramidalized CI optimized at the SA2-CASSCF(6/6)/6-31G\*\* level of theory. b) Fractionally occupied SANOs calculated at the same geometry and level of theory. Orbitals in this figure were generated using an iso value of 0.10.

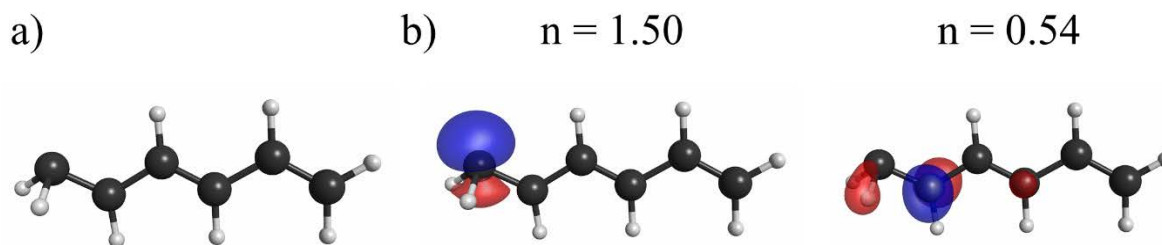

$E_{S0}(\text{SA-CASSCF}) = -231.70524197$   
 $E_{S1}(\text{SA-CASSCF}) = -231.70505773$

XYZ Coordinates (Angstrom):

|   |             |             |             |
|---|-------------|-------------|-------------|
| C | -1.89475298 | -0.04231501 | -0.40164122 |
| C | -0.63668853 | -0.22968727 | 0.18863463  |
| C | 0.58923763  | -0.00518211 | -0.54565597 |

|   |             |             |             |
|---|-------------|-------------|-------------|
| C | 1.77660894  | 0.06710275  | 0.05752497  |
| H | -1.90597785 | 0.84985739  | 0.40853426  |
| H | -2.73861289 | -0.57114941 | 0.05232100  |
| H | -0.48643962 | -0.42280018 | 1.25024068  |
| H | 0.49995726  | 0.11273932  | -1.61157393 |
| H | 1.83685291  | -0.03117397 | 1.13249111  |
| C | 3.03758192  | 0.29381076  | -0.64233303 |
| C | 4.21303558  | 0.38140225  | 0.00228819  |
| H | 2.98637795  | 0.39393261  | -1.71466303 |
| H | 5.13840771  | 0.54972231  | -0.51505333 |
| H | 4.25614023  | 0.28413552  | 1.07116914  |

### Octatetraene Ground State

Figure SP7: a) Ground state minimum energy geometry of octatetraene optimized at the B3LYP/6-31G\*\* level of theory and verified with a harmonic frequency calculation. b) Fractionally occupied SANOs at the ground state geometry, calculated at the SA2-CASSCF(8/8)/6-31G\*\* level of theory. Orbitals in this figure were generated using an iso value of 0.10.

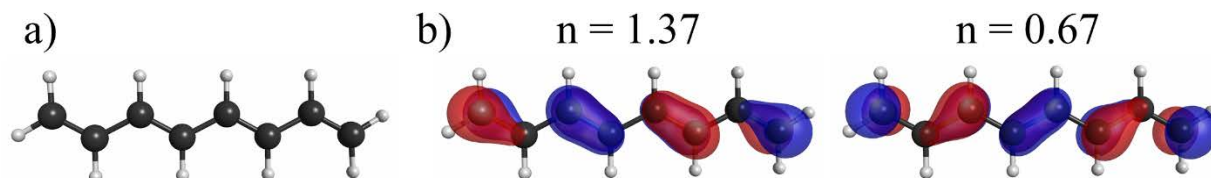

$E_{S0}(\text{B3LYP}) = -310.60206015$

$E_{S0}(\text{SA-CASSCF}) = -308.81990288$

$E_{S1}(\text{SA-CASSCF}) = -308.64383215$

XYZ Coordinates (Angstrom):

|   |             |             |             |
|---|-------------|-------------|-------------|
| C | -0.10685549 | 0.07753328  | 1.48243144  |
| C | -0.05146348 | -0.11057763 | 0.15258518  |
| C | 1.16904683  | -0.09740036 | -0.62675749 |
| C | 1.22102348  | -0.28504835 | -1.96873032 |
| C | 2.43373770  | -0.26917777 | -2.74756855 |
| C | 2.48619695  | -0.45522207 | -4.08964540 |
| H | 0.29018538  | -0.46085863 | -2.50978077 |
| H | 2.09736631  | 0.07882004  | -0.08168145 |
| H | -0.97665530 | -0.28640710 | -0.39728958 |
| H | -1.04791263 | 0.05999074  | 2.02238684  |
| H | 0.79154212  | 0.25671398  | 2.06820213  |
| H | 3.36478742  | -0.09469411 | -2.20642535 |
| C | 3.70725625  | -0.43763705 | -4.86797279 |
| H | 1.55815161  | -0.63013152 | -4.63542863 |
| C | 3.76458823  | -0.62056252 | -6.19844163 |
| H | 4.63144950  | -0.26228039 | -4.31625306 |
| H | 4.70617662  | -0.59733923 | -6.73747428 |
| H | 2.86735549  | -0.80044529 | -6.78584930 |

### Octatetraene MECI

Figure SP8: a) Octatetraene twisted and pyramidalized CI optimized at the SA2-CASSCF(8/8)/6-31G\*\* level of theory. b) Fractionally occupied SANOs calculated at the same geometry and level of theory. Orbitals in this figure were generated using an iso value of 0.10.

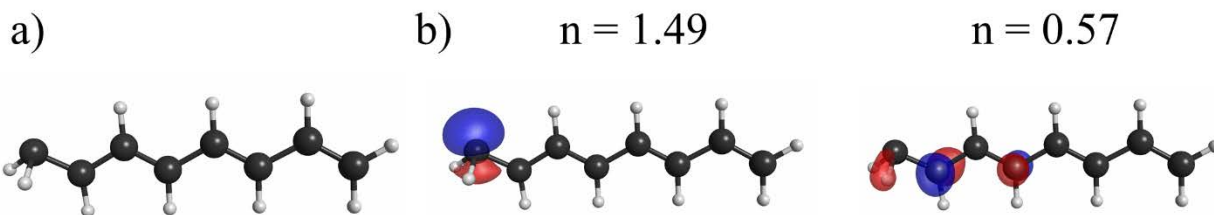

$E_{S_0}(\text{SA-CASSCF}) = -308.62709659$

$E_{S_1}(\text{SA-CASSCF}) = -308.62647274$

XYZ Coordinates (Angstrom):

|   |             |             |             |
|---|-------------|-------------|-------------|
| C | 0.53436553  | -0.01401809 | -0.54653490 |
| C | 1.74336648  | 0.06405209  | 0.07050698  |
| C | 2.99882483  | 0.28699815  | -0.63015354 |
| C | 4.17448664  | 0.37715557  | -0.01623212 |
| C | -0.68833148 | -0.24084303 | 0.17958772  |
| C | -1.96375418 | -0.06438515 | -0.40739673 |
| H | -1.91998160 | 0.83976346  | 0.40496713  |
| H | -2.80088663 | -0.56127799 | 0.08107849  |
| H | -0.54256481 | -0.42160907 | 1.24540079  |
| H | 0.44629440  | 0.11642311  | -1.61100972 |
| H | 1.79203093  | -0.04123193 | 1.14263844  |
| H | 2.94306779  | 0.38526523  | -1.70182514 |
| C | 5.45093393  | 0.60471010  | -0.69512391 |
| H | 4.21548557  | 0.27900594  | 1.05717087  |
| C | 6.62503004  | 0.68959153  | -0.04603165 |
| H | 5.42016983  | 0.70453882  | -1.76830077 |
| H | 7.55178595  | 0.85646594  | -0.56581265 |
| H | 6.67695332  | 0.59263527  | 1.02548647  |

**Slab Model of Silicon Nanocrystal with Two Dangling Bond Defects (Si<sub>70</sub>H<sub>68</sub>)**

E<sub>so</sub>(FOMO-CASCI) = -302.53903357

E<sub>si</sub>(FOMO-CASCI) = -302.53834569

XYZ Coordinates (Angstrom):

---

|    |               |               |               |
|----|---------------|---------------|---------------|
| Si | -2.5422709268 | 2.3089075580  | -0.0473146060 |
| Si | -0.1859643952 | 2.3928016834  | -0.1490124730 |
| Si | -3.3710301982 | 4.3018248285  | 0.9094592593  |
| Si | -3.1815277015 | 0.4844880756  | 1.3206970751  |
| Si | 0.7375374557  | 2.7153668288  | 1.9959907253  |
| Si | -2.4592897189 | 4.6145852313  | 3.0659294912  |
| Si | -2.2499121267 | 0.8073362246  | 3.4631485018  |
| Si | -0.0996491263 | 4.7026561048  | 2.9628902834  |
| Si | -3.0975517326 | 2.7876003766  | 4.4339201703  |
| Si | 0.1096620020  | 0.8883881025  | 3.3650209646  |
| Si | 0.6562780717  | 0.3992374559  | -1.1265080065 |
| Si | -5.7207266974 | 4.2332405229  | 1.0583722266  |
| Si | -2.3360432382 | -1.5047336923 | 0.3776030510  |
| Si | -5.5263977923 | 0.3932199087  | 1.4952598159  |
| Si | 0.9430381757  | -1.0973328094 | 2.3971144204  |
| Si | 0.9607211387  | 1.1790027577  | 5.5381520069  |
| Si | 0.7568198169  | 5.0100939677  | 5.1355791141  |
| Si | -5.4576684247 | 2.7119085702  | 4.5466150903  |
| Si | -2.2051423245 | 3.0968258049  | 6.5992090029  |
| Si | -6.3449298279 | 2.3995884357  | 2.3919830242  |
| Si | 0.1427714119  | 3.1713752167  | 6.4672607201  |
| Si | 0.0060684596  | -1.4095832979 | 0.2635644322  |
| Si | -3.3962583975 | 2.0113597452  | -2.2210851141 |
| Si | -3.3010187693 | 6.6004831525  | 4.0354889132  |
| Si | 3.0812075126  | 2.8114033411  | 1.7885710703  |
| Si | -6.2688103488 | 4.7034660076  | 5.5032492415  |
| Si | -6.5385110764 | 6.2316915842  | 1.9791728203  |
| Si | -0.0625831717 | 6.9968110557  | 6.0821932032  |
| Si | -3.0669338866 | 5.0782805683  | 7.5307709477  |
| Si | 3.2852729890  | -1.0209321251 | 2.2241186779  |
| Si | -3.2200897012 | -1.8393848967 | -1.7741937998 |
| Si | -0.2659086230 | 0.0870610009  | -3.2691504559 |
| Si | 3.0063393105  | 0.4423136102  | -1.2589109333 |
| Si | -2.4103578722 | 6.9136517729  | 6.2012019016  |
| Si | -5.4139420194 | 5.0076090292  | 7.6732315458  |
| Si | -5.6597637724 | 6.5338660684  | 4.1408997457  |
| Si | -3.2601612861 | 8.9003311221  | 7.1351352079  |
| Si | -6.4554960769 | 8.5391992451  | 5.0854630530  |
| Si | -6.2416734067 | 6.9973504292  | 8.6036828471  |
| Si | -5.6019896839 | 8.8078834460  | 7.2553060678  |
| Si | -2.6121548021 | -0.0097217812 | -3.1245637142 |
| Si | 0.5700067558  | -1.8909042426 | -4.2454345456 |
| Si | 0.8379503499  | -3.4000384881 | -0.6960314440 |
| Si | 3.8457552921  | -1.5648524575 | -2.1926831391 |
| Si | 3.9023221586  | 0.8058061038  | 0.8803395358  |
| Si | 2.9331811213  | -1.7864474384 | -4.3491025897 |

---

---

|    |               |               |               |
|----|---------------|---------------|---------------|
| Si | -0.3008773859 | -2.2227249397 | -6.4027883668 |
| Si | -0.0579512445 | -3.7030402119 | -2.8467323606 |
| Si | 3.1629564374  | -3.3986681283 | -0.8573033130 |
| Si | 6.1862884394  | -1.5148781052 | -2.3403759934 |
| Si | 3.8258481404  | -3.7138752926 | -5.3774394433 |
| Si | 0.8239630395  | -5.6723175844 | -3.7676313598 |
| Si | -2.4024044093 | -3.8447588402 | -2.6807190685 |
| Si | 4.0731140231  | -3.0454771730 | 1.3208233617  |
| Si | 4.0295480783  | -5.6642890505 | -1.1368740562 |
| Si | -0.0156804949 | -6.0323661520 | -5.9572736217 |
| Si | 3.1697417189  | -5.4970684224 | -4.0073210291 |
| Si | 6.1863174299  | -3.7271458668 | -5.4556798123 |
| Si | 2.8895650696  | -4.1108933575 | -7.5176560740 |
| Si | 6.3050544496  | -5.3801323495 | -1.9949230192 |
| Si | 4.0448121306  | -7.5284295593 | -4.9180547653 |
| Si | 0.5487396882  | -4.2023503302 | -7.3259089601 |
| Si | 0.7646663257  | -8.0381403749 | -6.8789633146 |
| Si | 3.7708778518  | -6.0873324781 | -8.4436670839 |
| Si | 6.9788305181  | -3.5162464877 | -3.2611915157 |
| Si | 6.9932093975  | -5.7130807066 | -6.4427697864 |
| Si | 6.4029069685  | -7.5489762865 | -5.0868399326 |
| Si | 6.1080554685  | -6.0036895175 | -8.5990555027 |
| Si | 3.1040237020  | -7.9070048056 | -7.1051966684 |
| Si | 7.1668684853  | -7.3680750248 | -2.8595682929 |
| H  | 0.2020539708  | 3.5400706619  | -1.0007514486 |
| H  | -2.9607506296 | 5.4404613162  | 0.0577929264  |
| H  | 0.2877531600  | 5.8545412630  | 2.1184051061  |
| H  | -5.8415117352 | 1.5674081739  | 5.4013764050  |
| H  | -5.8998213539 | -0.7315287104 | 2.3755047622  |
| H  | -6.1225251767 | 0.1571708590  | 0.1656906310  |
| H  | -6.2791548728 | 4.0485964682  | -0.2980918494 |
| H  | -7.8208221515 | 2.3507570992  | 2.4844845065  |
| H  | 2.2319781840  | 5.0685250701  | 5.0569812568  |
| H  | -2.6115910469 | 1.9474197656  | 7.4366914065  |
| H  | 0.6932967099  | 3.3633068845  | 7.8268005626  |
| H  | 2.4352487972  | 1.2265144280  | 5.4928918535  |
| H  | 0.5561870334  | 0.0332512178  | 6.3761300298  |
| H  | 0.5719606838  | -2.2408932851 | 3.2591607714  |
| H  | -2.7214402682 | -2.6443893640 | 1.2394759289  |
| H  | 0.3462867570  | 8.1598095440  | 5.2702090298  |
| H  | 0.4836201132  | 7.1609026088  | 7.4442312582  |
| H  | -2.5071522355 | 5.2694762812  | 8.8871063602  |
| H  | -2.8997073934 | 7.7487393809  | 3.1915781631  |
| H  | -7.7462637561 | 4.6425454328  | 5.5591044386  |
| H  | -8.0123067941 | 6.1855546232  | 2.0555704350  |
| H  | -6.1497113061 | 7.3713615118  | 1.1255315804  |
| H  | -5.8077656544 | 3.8574430519  | 8.5138659323  |
| H  | -5.7006021795 | 7.1690182785  | 9.9659767378  |
| H  | -7.7129520741 | 6.9275273346  | 8.6879331078  |
| H  | -2.8447205629 | 10.0457415200 | 6.3023149009  |
| H  | -2.6979956239 | 9.0766935456  | 8.4887172911  |

---

---

|   |               |               |               |
|---|---------------|---------------|---------------|
| H | -7.9307412824 | 8.5123142474  | 5.1120824682  |
| H | -6.0269090311 | 9.6743459027  | 4.2445202288  |
| H | -2.6389479895 | -0.3363144424 | 4.3183377959  |
| H | -6.1156419066 | 10.0649921953 | 7.8396167573  |
| H | -4.6936862604 | -1.9265226745 | -1.6968942732 |
| H | 0.1215714321  | 1.2287958431  | -4.1270628744 |
| H | -2.9500647339 | 3.1304161409  | -3.0743859090 |
| H | -4.8712717719 | 2.0104066443  | -2.1918014626 |
| H | -3.1656593987 | -0.2078431623 | -4.4814721417 |
| H | 3.4398531349  | 3.9394667408  | 0.9064296153  |
| H | 3.6991103866  | 3.0390105346  | 3.1089323563  |
| H | 3.8738770546  | -0.8595767538 | 3.5711448829  |
| H | 3.3996425171  | 1.5478538644  | -2.1599607014 |
| H | 5.3768028367  | 0.8727509294  | 0.7922902189  |
| H | 0.4093675690  | -4.5455671654 | 0.1370156241  |
| H | 3.3227431713  | -0.6252542199 | -5.1775996697 |
| H | -2.7384330244 | -4.9769084945 | -1.7953330228 |
| H | -3.0036668940 | -4.0977580345 | -4.0038345492 |
| H | 5.5472923830  | -3.0272932629 | 1.2384370689  |
| H | 3.6720032792  | -4.1746592372 | 2.1802329731  |
| H | 0.5274300517  | -6.8517925777 | -2.9302562692 |
| H | 0.0511085766  | -1.0835667017 | -7.2726123150 |
| H | -1.7704449890 | -2.3325942554 | -6.3408054105 |
| H | -1.4861657083 | -6.1037736866 | -5.8404448545 |
| H | 3.2748823575  | -2.9748021584 | -8.3810406409 |
| H | 6.6312878155  | -2.5871748907 | -6.2843852909 |
| H | 6.9247502865  | -5.2111912815 | -0.6543960200 |
| H | 6.7743337393  | -1.3350961429 | -1.0004588575 |
| H | 6.6201154637  | -0.3928882638 | -3.1961433783 |
| H | -0.0113909171 | -4.4521354220 | -8.6706326552 |
| H | 8.4573518753  | -3.5067082329 | -3.3208232301 |
| H | 8.4684290898  | -5.6520235554 | -6.5118201637 |
| H | 3.1816371112  | -6.3009611033 | -9.7834416386 |
| H | 6.8139778723  | -8.8233315240 | -5.7101774584 |
| H | 6.5124225797  | -4.8723085289 | -9.4526633080 |
| H | 6.6186712195  | -7.2596455298 | -9.1796290737 |
| H | 3.6890816414  | -9.1673029244 | -7.6046539714 |
| H | 0.2016616577  | -8.2330554297 | -8.2289369339 |
| H | 0.4170690750  | -9.1942632660 | -6.0353031831 |
| H | 8.6409509217  | -7.3987175488 | -2.8850674172 |
| H | 6.6654570611  | -8.5316007053 | -2.1068586498 |

---
